# Supplementary material for: Comparison of five different RNA sources to examine the lactating bovine mammary gland transcriptome using RNA-Sequencing
Source: PubMed Central journal article supplement — Sci Rep. 2014 Jul 8;4:5297. doi: 10.1038/srep05297 (PMC5381611; doi:10.1038/srep05297), 2014-07-08
Supplement: srep05297-s1.pdf [file srep05297-s1.pdf]

## **Comparison of five different RNA sources to examine the lactating bovine mammary gland transcriptome using RNA-Sequencing**

Angela Cánovas<sup>1</sup>, Gonzalo Rincón<sup>1</sup>, Claudia Bevilacqua<sup>2</sup>, Alma Islas-Trejo<sup>1</sup>, Pauline Brenaut<sup>2</sup>, Russell C. Hovey<sup>1</sup>, Marion Boutinaud<sup>3</sup>, Caroline Morgenthaler<sup>2</sup> Monica K. VanKlompberg<sup>1</sup>, Patrice Martin<sup>2\*</sup>, Juan F. Medrano<sup>1\*</sup>

<sup>1</sup>Department of Animal Science, University of California-Davis, One Shields Ave., Davis, 95616, CA, USA.

<sup>2</sup>Institut National de la Recherche Agronomique, UMR 1313 Génétique animale et Biologie intégrative, F-78350 Jouy-en-Josas, France.

<sup>3</sup>INRA, AGROCAMPUS OUEST, UMR1348 PEGASE, F-35590 Saint-Gilles, France

\*Corresponding authors: JFM and PM (given their respective contributions they must be identified as having contributed equally). E-mails: [jfmedrano@ucdavis.edu](mailto:jfmedrano@ucdavis.edu), [patrice.martin@jouy.inra.fr](mailto:patrice.martin@jouy.inra.fr)

**Supplementary File 1** Markers of myoepithelial cells, milk epithelial cells and immune cells used to validate the selectivity and specificity of laser capture microdissection by qPCR.

| <b>Genes</b>                                                                      | <b>Primers</b>     | <b>Sequence 5'&gt;3'</b>                                         | <b>Amplicon size (nt)</b> |
|-----------------------------------------------------------------------------------|--------------------|------------------------------------------------------------------|---------------------------|
| <b>κ-casein (CSN3)</b><br><i>GenBank: NM_174294.2</i>                             | forward<br>reverse | AGG TGC AAT GAT GAA GAG TTT TTT C<br>CCC AAA AAT GGC AGG GTT AA  | 66                        |
| <b>Cluster of differentiation 3 epsilon (CD3e)</b><br><i>GenBank: NM_174011.3</i> | forward<br>reverse | ACG CTG TAC CTG AAA GCA AGA<br>AAT ACA CCA GCA GCA GCA AG        | 118                       |
| <b>Cluster of differentiation 68 (CD68)</b><br><i>GenBank: NM_001045902.1</i>     | forward<br>reverse | GAT CTG CTC TCC CTG AAG CTAC A<br>CAT TGG GAC AAG AGA AAC TTG GT | 79                        |
| <b>Cluster of differentiation 18 (CD18)</b><br><i>GenBank: M81233.1</i>           | forward<br>reverse | AGC GAC CTC AGG GAG TAC CA<br>TTA TCG TTG TTC CAC TGG GAC TT     | 65                        |
| <b>Keratin 14 (KRT14)</b><br><i>GenBank: NM_001166575.1</i>                       | forward<br>reverse | CCC AGC TCA GCA TGA AAG C<br>AGC GGC CTT TGG TCT CTT C           | 57                        |

**Supplementary File 2** Quantification of specific markers for mammary myoepithelial cells (Krt14), lymphocytes (CD3e), neutrophils (CD18), macrophages (CD68 and CD18) and MEC (CSN3) by qPCR.

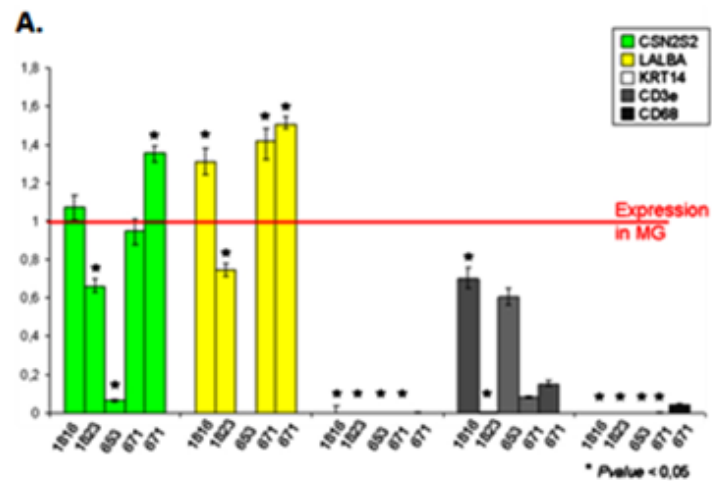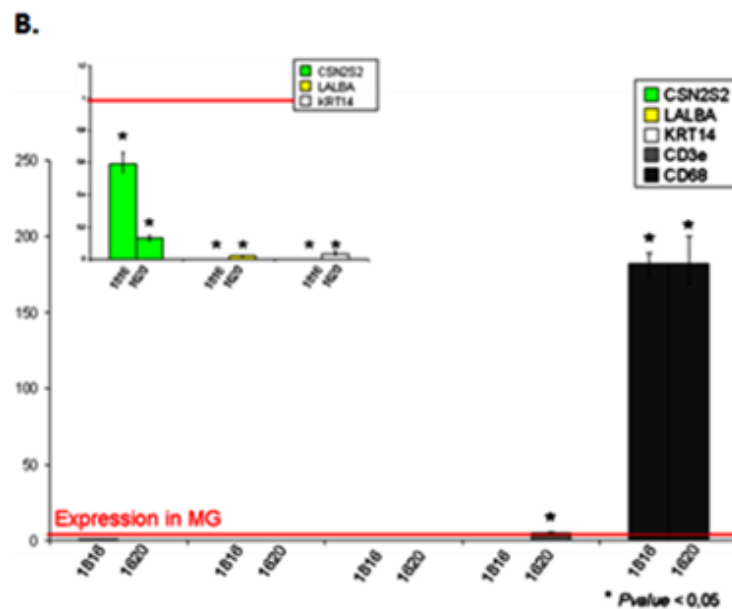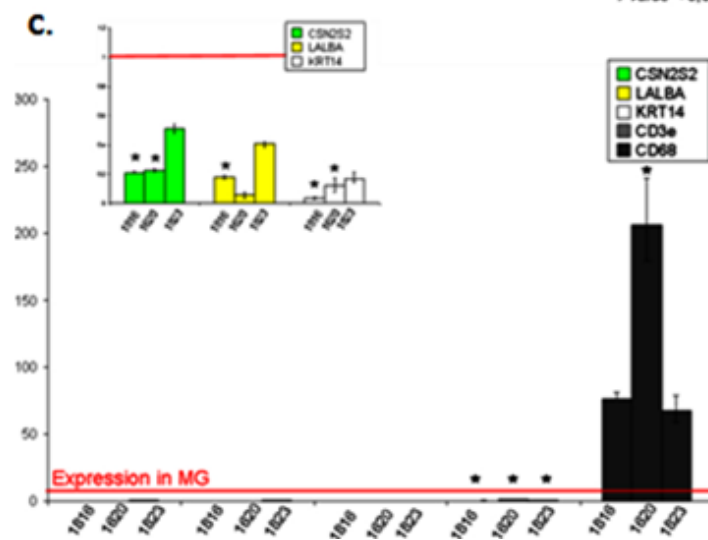

**Supplementary File 3** Correlations between highly expressed genes ( $\geq 500$  RPKM) of MGT, SC, LCMEC, MFG and mMEC transcriptome in Jersey and Normande cows.

|              |                 | MGT    |          | SC     | LCMEC  |          | MFG    |          | mMEC   |          |
|--------------|-----------------|--------|----------|--------|--------|----------|--------|----------|--------|----------|
|              |                 | Jersey | Normande | Jersey | Jersey | Normande | Jersey | Normande | Jersey | Normande |
| <b>MGT</b>   | <b>Jersey</b>   | 1.00   | -        | -      | -      | -        | -      | -        | -      | -        |
|              | <b>Normande</b> | 0.97   | 1.00     | -      | -      | -        | -      | -        | -      | -        |
| <b>SC</b>    | <b>Jersey</b>   | 0.98   | 0.91     | 1.00   | -      | -        | -      | -        | -      | -        |
| <b>LCMEC</b> | <b>Jersey</b>   | 0.99   | 0.99     | 0.95   | 1.00   | -        | -      | -        | -      | -        |
|              | <b>Normande</b> | 0.99   | 0.99     | 0.95   | 1.00   | 1.00     | -      | -        | -      | -        |
| <b>MFG</b>   | <b>Jersey</b>   | 0.94   | 0.85     | 0.97   | 0.90   | 0.89     | 1.00   | --       | -      | -        |
|              | <b>Normande</b> | 0.96   | 0.93     | 0.96   | 0.95   | 0.94     | 0.96   | 1.00     | -      | -        |
| <b>mMEC</b>  | <b>Jersey</b>   | 0.08   | 0.01     | 0.16   | 0.04   | 0.01     | 0.36   | 0.24     | 1.00   | -        |
|              | <b>Normande</b> | 0.05   | 0.02     | 0.09   | 0.04   | 0.02     | 0.19   | 0.16     | 0.58   | 1.00     |

MGT: mammary gland tissue; SC: milk somatic cells; LCMEC: laser microdissected mammary epithelial cells; MFG: milk fat globules; mMEC: antibody- captured milk mammary epithelial cells.

**Supplementary File 4** Correlations between normally/medium expressed genes (ranged from 500 to 10 RPKM) of MGT, SC, LCMEC, MFG and mMEC transcriptome in Jersey and Normande cows.

|              |                 | MGT    |          | SC     | LCMEC  |          | MFG    |          | mMEC   |          |
|--------------|-----------------|--------|----------|--------|--------|----------|--------|----------|--------|----------|
|              |                 | Jersey | Normande | Jersey | Jersey | Normande | Jersey | Normande | Jersey | Normande |
| <b>MGT</b>   | <b>Jersey</b>   | 1.00   | -        | -      | -      | -        | -      | -        | -      | -        |
|              | <b>Normande</b> | 0.91   | 1.00     | -      | -      | -        | -      | -        | -      | -        |
| <b>SC</b>    | <b>Jersey</b>   | 0.95   | 0.97     | 1.00   | -      | -        | -      | -        | -      | -        |
| <b>LCMEC</b> | <b>Jersey</b>   | 0.91   | 0.91     | 0.95   | 1.00   | -        | -      | -        | -      | -        |
|              | <b>Normande</b> | 0.84   | 0.93     | 0.99   | 0.95   | 1.00     | -      | -        | -      | -        |
| <b>MFG</b>   | <b>Jersey</b>   | 0.87   | 0.87     | 0.81   | 0.95   | 0.96     | 1.00   | --       | -      | -        |
|              | <b>Normande</b> | 0.96   | 0.86     | 0.87   | 0.90   | 0.96     | 0.95   | 1.00     | -      | -        |
| <b>mMEC</b>  | <b>Jersey</b>   | 0.40   | 0.14     | 0.75   | 0.36   | 0.10     | 0.42   | 0.12     | 1.00   | -        |
|              | <b>Normande</b> | 0.35   | 0.32     | 0.39   | 0.34   | 0.22     | 0.35   | 0.34     | 0.27   | 1.00     |

MGT: mammary gland tissue; SC: milk somatic cells; LCMEC: laser microdissected mammary epithelial cells; MFG: milk fat globules; mMEC: antibody- captured milk mammary epithelial cells.

**Supplementary File 5** Correlations between lowly expressed genes (<10 RPKM) of MGT, SC, LCMEC, MFG and mMEC transcriptome in Jersey and Normande cows.

|              |                 | MGT    |          | SC     | LCMEC  |          | MFG    |          | mMEC   |          |
|--------------|-----------------|--------|----------|--------|--------|----------|--------|----------|--------|----------|
|              |                 | Jersey | Normande | Jersey | Jersey | Normande | Jersey | Normande | Jersey | Normande |
| <b>MGT</b>   | <b>Jersey</b>   | 1.00   | -        | -      | -      | -        | -      | -        | -      | -        |
|              | <b>Normande</b> | 0.83   | 1.00     | -      | -      | -        | -      | -        | -      | -        |
| <b>SC</b>    | <b>Jersey</b>   | 0.77   | 0.78     | 1.00   | -      | -        | -      | -        | -      | -        |
| <b>LCMEC</b> | <b>Jersey</b>   | 0.75   | 0.77     | 0.73   | 1.00   | -        | -      | -        | -      | -        |
|              | <b>Normande</b> | 0.84   | 0.78     | 0.87   | 0.75   | 1.00     | -      | -        | -      | -        |
| <b>MFG</b>   | <b>Jersey</b>   | 0.81   | 0.82     | 0.82   | 0.73   | 0.73     | 1.00   | --       | -      | -        |
|              | <b>Normande</b> | 0.87   | 0.81     | 0.83   | 0.63   | 0.67     | 0.76   | 1.00     | -      | -        |
| <b>mMEC</b>  | <b>Jersey</b>   | 0.13   | 0.06     | 0.81   | 0.06   | 0.06     | 0.46   | 0.34     | 1.00   | -        |
|              | <b>Normande</b> | 0.12   | 0.13     | 0.21   | 0.08   | 0.10     | 0.12   | 0.61     | 0.18   | 1.00     |

MGT: mammary gland tissue; SC: milk somatic cells; LCMEC: laser microdissected mammary epithelial cells; MFG: milk fat globules; mMEC: antibody- captured milk mammary epithelial cells.

**Supplementary File 6** Correlation values using the ranking/position of the RPKM gene expression values ranged from the most expressed gene to the lowest expressed gene in mammary gland tissue, SC, LCMEC, MFG and mMEC transcriptome in Jersey and Normande cows.

|              |                 | MGT    |          | SC     | LCMEC  |          | MFG    |          | mMEC   |          |
|--------------|-----------------|--------|----------|--------|--------|----------|--------|----------|--------|----------|
|              |                 | Jersey | Normande | Jersey | Jersey | Normande | Jersey | Normande | Jersey | Normande |
| <b>MGT</b>   | <b>Jersey</b>   | 1.00   | -        | -      | -      | -        | -      | -        | -      | -        |
|              | <b>Normande</b> | 0.96   | 1.00     | -      | -      | -        | -      | -        | -      | -        |
| <b>SC</b>    | <b>Jersey</b>   | 0.94   | 0.94     | 1.00   | -      | -        | -      | -        | -      | -        |
| <b>LCMEC</b> | <b>Jersey</b>   | 0.93   | 0.93     | 0.92   | 1.00   | -        | -      | -        | -      | -        |
|              | <b>Normande</b> | 0.92   | 0.94     | 0.90   | 0.90   | 1.00     | -      | -        | -      | -        |
| <b>MFG</b>   | <b>Jersey</b>   | 0.94   | 0.91     | 0.95   | 0.93   | 0.89     | 1.00   | -        | -      | -        |
|              | <b>Normande</b> | 0.91   | 0.91     | 0.92   | 0.89   | 0.94     | 0.90   | 1.00     | -      | -        |
| <b>mMEC</b>  | <b>Jersey</b>   | 0.91   | 0.82     | 0.94   | 0.90   | 0.80     | 0.93   | 0.80     | 1.00   | -        |
|              | <b>Normande</b> | 0.82   | 0.76     | 0.73   | 0.80   | 0.79     | 0.80   | 0.84     | 0.69   | 1.00     |

MGT: mammary gland tissue; SC: milk somatic cells; LCMEC: laser microdissected mammary epithelial cells; MFG: milk fat globules; mMEC: antibody- captured milk mammary epithelial cells.
